# Supplementary material for: Interplay between Thermally Induced Aragonite–Calcite Transformation and Multistep Dehydration in a Seawater Spiral Shell (Euplica scripta)
Source: MDPI journal article supplement (doi:10.3390/pr11061650), 2023-05-29
Supplement: s1 [file s1]

Archive with 1 entries (1 files):
- processes-2339955-supplementary.pdf
